## Review Article

# The role of CaMKK2 in Golgi-associated vesicle trafficking

Grace Kennedy<sup>1</sup>, Olivia Gibson<sup>1</sup>, Dáire T. O'Hare<sup>1</sup>,  Ian G. Mills<sup>1,2</sup> and  Emma Evergren<sup>1</sup>

<sup>1</sup>Patrick G Johnston Centre for Cancer Research, Queen's University Belfast, 97 Lisburn Road, BT9 7AE Belfast, U.K.; <sup>2</sup>Nuffield Department of Surgical Sciences, University of Oxford, John Radcliffe Hospital, Headley Way, OX3 9DU Oxford, U.K.

**Correspondence:** Emma Evergren (E.Evergren@qub.ac.uk)

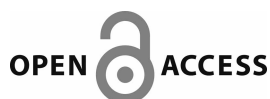

Calcium/calmodulin-dependent protein kinase kinase 2 (CaMKK2) is a serine/threonine-protein kinase, that is involved in maintaining various physiological and cellular processes within the cell that regulate energy homeostasis and cell growth. CaMKK2 regulates glucose metabolism by the activation of downstream kinases, AMP-activated protein kinase (AMPK) and other calcium/calmodulin-dependent protein kinases. Consequently, its deregulation has a role in multiple human metabolic diseases including obesity and cancer. Despite the importance of CaMKK2, its signalling pathways and pathological mechanisms are not completely understood. Recent work has been aimed at broadening our understanding of the biological functions of CaMKK2. These studies have uncovered new interaction partners that have led to the description of new functions that include lipogenesis and Golgi vesicle trafficking. Here, we review recent insights into the role of CaMKK2 in membrane trafficking mechanisms and discuss the functional implications in a cellular context and for disease.

## Introduction

Calcium ( $\text{Ca}^{2+}$ ) functions as one of the most critical second messengers that regulate a host of downstream signalling events. The  $\text{Ca}^{2+}$  sensor calmodulin binds and regulates the activity of target proteins, which include calcium/calmodulin-dependent kinases (CaMK). CaMK kinase (CaMKK) 2 regulates CaMKI and IV by phosphorylating them. In addition, it phosphorylates the  $\alpha$ -subunit of AMP-activated protein kinase (AMPK). AMPK is regarded as the master metabolic protein kinase and consequently CaMKK2 has emerged as the primary CaMK participating in the regulation of metabolic homeostasis. CaMKK2 is highly expressed in the hypothalamus and plays a fundamental role in whole-body energy homeostasis and glucose metabolism and is associated with many metabolic diseases. It is overexpressed in and promotes prostate, breast, liver, ovarian and gastric cancer [1–5]. In this review, we discuss research on CaMKK2 that contextualises its functions that are associated with intracellular membrane trafficking.

## Structural and functional insights to CaMKK2

CaMKK2 (CAMKK $\beta$ ) is a calcium/calmodulin-dependent serine/threonine-protein kinase [6]. The sequence homology of CaMKK2 with family members CaMKK1 (CAMKK $\alpha$ ), CaMKI and CaMKIV are high. For example, CaMKK1 and CaMKK2 show a 70% amino acid identity [6]. CaMKK2 is composed of an N-terminal regulatory domain containing three phosphorylation sites (serines) for GSK3, CDK5 and PKA (Figure 1A). A central catalytic domain is immediately followed by a domain containing the regulatory and calmodulin-binding sequences [7]. CaMKK2 has a significant kinase activity at steady state, but its activity is significantly increased by an elevation in intracellular  $\text{Ca}^{2+}$  and binding of calcium-calmodulin (CaM) [6–8]. The interaction of CaMKK2 with CaM releases the binding of the autoinhibitory region and leads to the activation of the enzymatic activity [9,10]. Its autonomous activity is dependent on the autophosphorylation of Thr482 in the C-terminal regulatory domain,

Received: 10 December 2022  
 Revised: 3 February 2023  
 Accepted: 7 February 2023

Version of Record published:  
 23 February 2023

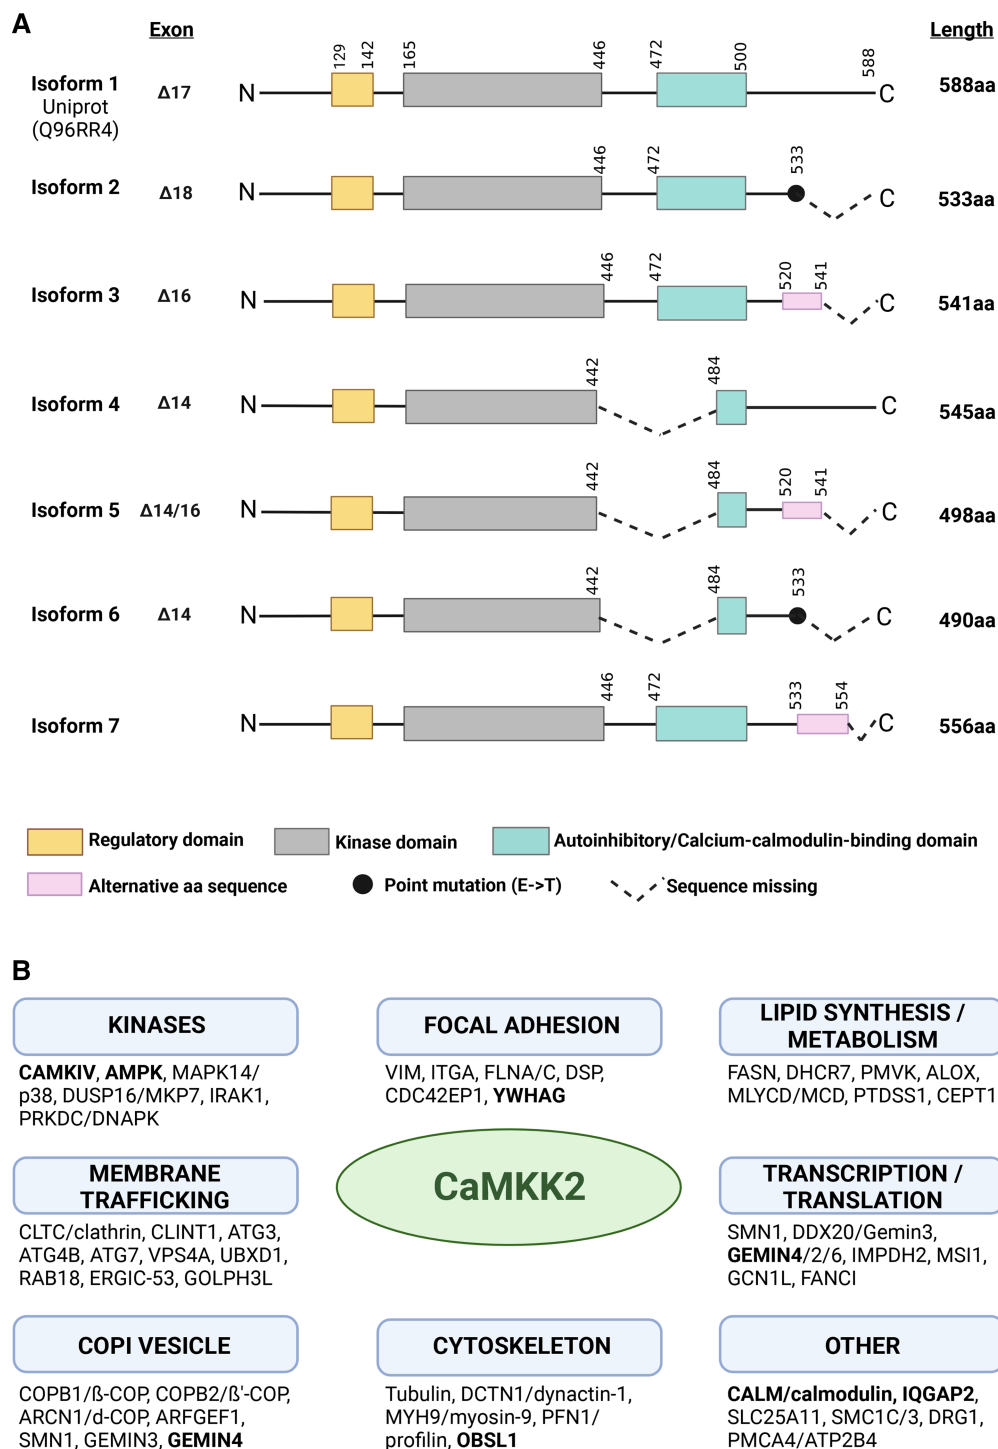

**Figure 1. Summary of CaMKK2 domain structure and interactors identified by affinity capture mass spectrometry.**

Part 1 of 2

(A) CaMKK2 contains three domains: the regulatory domain, the central serine/threonine kinase domain and the N-terminal autoinhibitory and calcium/calmodulin-binding domain (AID/CBD). There are seven distinct isoforms of CaMKK2 that differ in the C-terminal region due to the splicing of exons. Isoforms 4, 5 and 6 lack exon 14, which encodes the sequence within the AID/CBD that is phosphorylated and facilitates kinase activation. This loss removes the catalytic activity of isoforms 4, 5 and 6 and these, therefore, are found to be inactive. Isoforms 2 and 6 have truncated C-termini that may affect the inherent kinase activity. Furthermore, exon 17 is absent from isoform 1 and exon 18 is absent from isoform 2. Isoforms 3 and 5 have a deletion

**Figure 1. Summary of CaMKK2 domain structure and interactors identified by affinity capture mass spectrometry.**

Part 2 of 2

of exon 16 resulting in a change in the open reading frame, producing an alternative sequence (KPTRECESLSSELKEARQRRQPP) from the original isoform 1 sequence (QGSEDNLQGTDP PPVGEEEVLL) and an early termination of the transcript [13]. Isoform 3 is the predominant form of CaMKK2 expressed in prostate cancer [95]. (B) A summary of interaction partners of CaMKK2 that have been identified by affinity capture mass spectrometry is displayed in functional categories which illustrate the range of interactions associated with CaMKK2. Protein interactions that have been validated by independent biochemical experiments are displayed in bold. Figure created with BioRender.com.

while the calmodulin-dependent activity is dependent on the phosphorylation of serine residues in the N-terminal regulatory domain [11]. The catalytic domain is composed of two lobes that are connected by a flexible linker: the ATP-binding pocket and the substrate-binding domain [12]. CaMKK2 has seven isoforms that differ in their domain composition and ability to autophosphorylate and phosphorylate downstream targets (Figure 1A). It is mainly the longest isoform that is well characterised (588 aa, 64.7 kDa). Based on the sequences (Figure 1A), there may be differences among the isoforms in relation to kinase activity, autoinhibition and autophosphorylation [1,13].

The active CaMKK2 directly phosphorylates downstream kinases CaMKI, CAMKIV and AMPK, which regulates cellular metabolism. AMPK is central in the regulation of energy homeostasis because it acts as an energy sensor. The conversion of ATP to AMP/ADP due to energy stress activates the kinase activity of AMPK, phosphorylating downstream targets that control cell proliferation pathways, and transcription and translation factors. In turn, processes like autophagy and catabolism of fatty acids and glucose are increased, while the synthesis of macromolecules like proteins and cholesterol is decreased. CaMKIV activation results in the activation of transcriptional programmes that regulate the expression of proteins that mediate cell growth and metabolism [2,14].

Further functional insights for CaMKK2 arise from studies investigating the localisation of the enzyme. Its localisation is predominantly cytosolic as determined by immunocytochemistry and biochemical fractionation experiments [15–17]. However, it has also been shown to localise to the nucleus and facilitate transcriptional regulation in prostate and ovarian epithelial cells [8,18]. In ovarian cancer cells, this translocation is induced by epidermal growth factor (EGF) stimulation [8]. In addition to its cytosolic localisation, an experiment using subcellular fractionation of endothelial cells showed a prominent association of CaMKK2 with the endoplasmic reticulum (ER) and mitochondria [15]. While more research is required to fully understand the recruitment and function of CaMKK2 at the ER and mitochondria it is interesting in the context of recent studies showing that AMPK, considered to be a mainly cytosolic protein, under some circumstances is activated on the surface of the lysosome by LKB1 and at the ER and Golgi by CaMKK2 [19–22]. Thus, illustrating the necessity to define protein–protein interactions and their spatial location within cells in order to develop a complete picture of the biological functions of CaMKK2 and other kinases in relation to signalling and metabolism.

## The CaMKK2 interactome and substrates

The interactome of CaMKK2 has been determined experimentally from co-immunoprecipitation of EGFP-tagged CaMKK2 in HEK293 cells and from immunoprecipitation of endogenous CaMKK2 from cell lines [23–26]. Among the cellular ontologies that are enriched in the interactome of CaMKK2 we find focal adhesions, lipid synthesising and metabolising enzymes, translational regulators, membrane trafficking and vesicle-associated proteins (Figure 1B). This indicates that we have a limited understanding of the function of CaMKK2, and there are additional pathways beyond cellular signalling that are regulated by CaMKK2. One example of a CaMKK2-binding protein that was identified by mass spectrometry and has expanded our understanding of the functional repertoire of CaMKK2 is fatty acid synthase (FASN) [24]. Functional studies show that the down-regulation of CaMKK2 by microRNA and in knockout mice generates a significant increase in lipid accumulation along with increased levels of FASN and SREBP1c, indicating either a direct or indirect relationship between FASN and CaMKK2 signalling [27,28]. Mapping of the kinome of CaMKK2 using quantitative phospho-proteomics of cells treated with the inhibitor STO-609 also enhance our understanding of the function of the protein. Recent studies in gastric cancer cell lines identified several potential novel substrates of CaMKK2 [29,30]. Novel CaMKK2 substrates include kinases in the ephrin receptor signalling pathway, EGF

signalling and the MAPK pathway. Furthermore, proteins that are hypo-phosphorylated in cells treated with STO-609 associate with focal adhesions, plasma membrane, cytosol, vesicle membrane and the Golgi apparatus to mention a few [29]. The main limitation of these studies is the poor specificity of the inhibitor STO-609, but nevertheless adds significant information to our understanding of the complexity of CaMKK2 functions [10]. Together, the interactome and kinome of CaMKK2 implicate that this kinase has functions associated with membranes and membrane trafficking.

## Regulation of intracellular membrane trafficking by calcium/calmodulin

Cells rapidly respond to their physical environment, energy demands and signalling molecules. A key part of this response is the use of vesicle trafficking between organelles and in the secretory pathway. These trafficking pathways are important for the delivery of newly synthesised proteins and lipids to the correct target location, and in addition, orchestrate the homeostasis of these organelles. Here, we will discuss their regulation by CaM. The main calcium stores in the mammalian cell are the ER, Golgi and the lysosome [31]. Calcium plays a well-established role in vesicle trafficking and CaM is emerging as an additional regulatory complex [32,33]. The direct involvement of CaM in endocytosis has recently been demonstrated through experiments in the calyx of Held nerve terminals in CaM knockout mice [34]. The effectors of CaM that regulate endocytosis include calcineurin, a protein phosphatase, CaMKK2 and protein kinase C (PKC) [34–36]. Vesicle trafficking between the ER and Golgi is regulated by calcium through mechanisms that include  $\text{Ca}^{2+}$  channels in the ER [31]. Vesicle formation is tightly regulated by the recruitment of membrane-binding and structural proteins that together form a coat of a defined size that envelope the membrane and create a bud that can be pinched off from the organelle. There are classes of coat proteins that facilitate the formation of vesicles from different organelles. For example, COPI and COPII, on the Golgi and ER mediate the trafficking of cargo in the retrograde and anterograde direction. Disruption of  $\text{Ca}^{2+}$  signalling abrogates coat recruitment and vesicle formation for both anterograde and retrograde vesicle trafficking between these two organelles [37–40]. In this context, it is important to mention that the Golgi is a  $\text{Ca}^{2+}$  storage organelle with a concentration gradient that ranges from 300  $\mu\text{M}$  in the cis-Golgi to 100  $\mu\text{M}$  in the trans-Golgi [31]. A transient localised increase in  $\text{Ca}^{2+}$  concentration can be sensed by CaM ( $K_d = 0.5\text{--}5\ \mu\text{M}$ ), which results in a conformational change and interaction with target proteins [41]. Experiments using cell-free assays with purified organelles demonstrate that the calcium chelator BAPTA or CaM inhibitors strongly inhibit Golgi vesicle transport [42]. The addition of BAPTA to a cell-free system showed a distinct loss of coated vesicles subsequent to coat assembly, demonstrating that calcium or a calcium-dependent sensor stabilises the COPI coat at the Golgi membrane [39]. Together with the fact that Golgi calcium stores are significant and contribute to subcellular signalling events highlight the significance of calcium and CaM in regulating Golgi vesicle trafficking [39,43,44]. The calcium sensors and CaM-dependent effectors remain not well understood and more research is, therefore, required in this area.

## Golgi membrane trafficking

The Golgi supports cellular functions such as intracellular vesicle trafficking, protein secretion, regulation of ion homeostasis and glycosylation [45]. It has an essential role as an intracellular signalling platform and a stress sensor that facilitates intracellular communication that impact on cell metabolism, death, migration and proliferation [46–50]. To sustain the function and organisation of Golgi cisternae and its resident proteins it is important that the flux of anterograde and retrograde vesicle trafficking is in balance [51,52]. Three types of coated vesicles have been described in association with the Golgi; COPI, COPII and clathrin [53–55] (Figure 2). Clathrin-coated vesicles bud from the trans-Golgi and mainly transport enzymes to the lysosome [56]. COPII-coated vesicle mainly transport cargo from the ER to the Golgi, while COPI-coated vesicles facilitate retrograde traffic from the Golgi to the ER and within the Golgi (Figure 2). Vesicle formation is modulated by the conserved oligomeric Golgi (COG) complex and small nucleotide-binding proteins of the Rab and Arf families that facilitate the recruitment of coatomer to the membrane [57]. The interactions of the coatomers with these modulators are important for protein stabilisation and vesicle trafficking [58]. Together, this illustrates the close relationship between modulating proteins and the impact on protein stability and functional Golgi vesicle trafficking. The Golgi is organised in stacks of cisternae with a *cis*- and a *trans*-face. These mini-stacks are linked together in a ribbon structure and can undergo dynamic changes resulting in compaction, dispersal, disassembly of the ribbon or dispersal of both the ribbon and mini-stacks [59]. Golgi morphology may change due to the dispersal of one compartment, for example, the trans-Golgi cisternae. Golgi

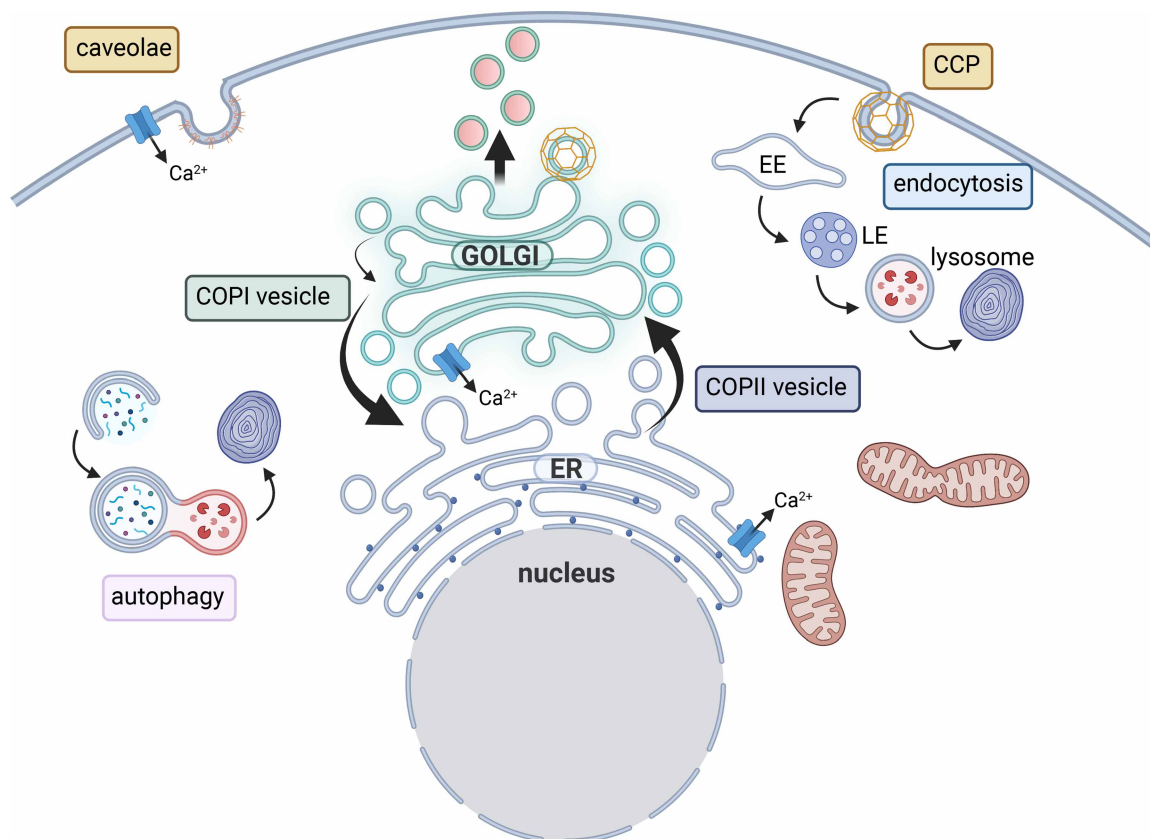

**Figure 2. Multiple intracellular membrane trafficking pathways are relevant for CaMKK2 biology.**

The Golgi is central to membrane trafficking and controls protein modifications and secretion. The Golgi is an important reservoir for  $\text{Ca}^{2+}$  together with the endoplasmic reticulum (ER) and regulates ion homeostasis. The Golgi is tightly linked with other organelles; the ER, lysosome and endosomes. Golgi vesicle trafficking is mediated by three types of coated vesicles. Anterograde trafficking from the ER to the Golgi in the secretory pathway is mediated by COPII-coated vesicles. Retrograde transport of vesicles Golgi-to-ER is mediated by COPI-coated vesicles. COPI vesicles also mediate intra-Golgi transport between cisternae. Clathrin-coated vesicles bud from the trans-Golgi where cargo molecules are concentrated in these vesicles. At the plasma membrane cargo molecules and receptors are internalised by coated vesicles that include caveolae and clathrin-coated pits (CCPs). Figure created with BioRender.com.

morphology is regulated by kinases and phosphatases, making it suited to respond to and co-ordinate cell signalling and processes during cancer and stress conditions [60]. Pathological conditions like these may result in the loss of the Golgi ribbon, which leads to a dispersed appearance [59]. For example, loss of  $\alpha$ -COP, a COPI coatomer or phosphorylation of Rab7 results in a dispersed Golgi morphology and increased area of the trans-Golgi [61,62]. An altered Golgi morphology is often observed when proteins linking the cisternae or the ribbon are depleted or the interaction with the cytoskeleton is lost, but is also regulated by Rab GTPases [60,63–66].

Given the central role of the Golgi and Golgi-ER trafficking in supporting organelle biogenesis and enzyme activity, it will also play an important role in responding and adapting to metabolic and proteotoxic stress. The ER responds through the unfolded protein response which can enhance protein folding capacity but also autophagic flux. This also leads to significant changes in the trafficking of vesicles between the Golgi and the ER and in protein secretion. To support these changes Golgi proteins are up-regulated and some of these are structural or mediators of vesicle trafficking [67–70]. Recent studies have linked the Golgi apparatus as an organelle able to control mTOR signalling directly, in addition to the tight regulation of mTOR signalling and cell proliferation by the lysosome [71–73]. One of the studies discovered part of ER-to-Golgi trafficking machinery, Rab1A, to be an independent controller of mTORC1 promoting cell proliferation [74]. We recently undertook



a study to learn more about the role of CaMKK2 in prostate cancer which commenced with a characterisation of CaMKK2 protein interactions and led us to investigate effects on Golgi trafficking and lysosome function in cancer cell proliferation.

### CaMKK2 as a regulator of membrane trafficking events

Recently, a few studies have shown an association of CaMKK2 with membrane trafficking events; endocytosis and COPI trafficking (Figure 3) [25,75]. A genome-wide screen of kinases that regulate transferrin internalisation identified CaMKK2 as a regulator of endocytosis [36]. Further studies show that a loss of CaMKK2 expression leads to impaired transferrin internalisation in HepG2, LNCaP and HeLa cell lines, which results in reduced intracellular iron content and impaired glucose metabolism and glycolysis [15,25,36,76]. Whether CaMKK2 directly regulates adaptor or accessory proteins in clathrin-mediated endocytosis, the endocytic pathway for the Transferrin receptor, is not known. In addition, CaMKK2 associates with the Cav1.2 calcium channel at caveolae on the plasma membrane where it phosphorylates CaMKI upstream of the transcription factor CREB, which results in the regulation of chemotaxis in vascular myocytes [75]. This illustrates the significance of membrane-associated localisation and temporal  $\text{Ca}^{2+}$  activation of CaMKK2. Co-immunoprecipitation studies have shown that CaMKK2 associates with the  $\delta$ -COP coat protein, a part of the COPI vesicle coat that mediates Golgi-ER trafficking [24,25]. This observation was further validated by demonstrating that the CaMKK2–Gemin4 complex efficiently enriched COPI coat proteins from a cell lysate [25]. Gemin4 is a part of

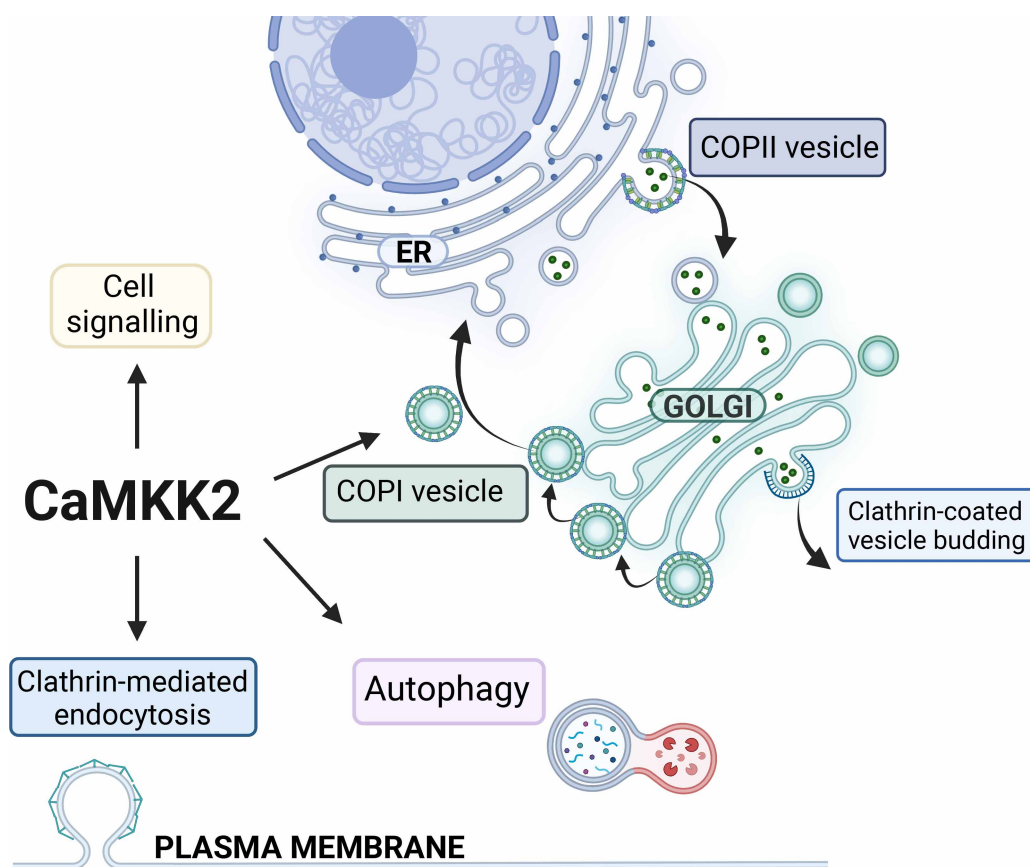

**Figure 3. CaMKK2 in intracellular membrane trafficking.**

Activation of CaMKK2 via its interaction with  $\text{Ca}^{2+}$ /calmodulin results in the activation of downstream signalling pathways through kinases AMPK, CaMKI, CaMKIV and protein kinase B (PKB). This drives functions related to metabolic regulation and transcriptional regulation. In addition to these activities, CaMKK2 regulates multiple membrane trafficking pathways, which include autophagy, clathrin-mediated endocytosis and Golgi vesicle trafficking. Regulation of these membrane trafficking pathways is important for cellular control of metabolism and cell survival. Figure created with BioRender.com.

multiple protein complexes that are involved in COPI/coatamer formation, autophagy, assembly of small nuclear ribonucleoproteins and trafficking of ribonucleoproteins. The COPI coat is composed from seven proteins that assemble into triad units that are recruited to the membrane together and interact with up to four triads to build the lattice of the coat [77,78]. The flexible linker regions of  $\delta$ -COP and  $\alpha$ -COP are important for cross-linking the coatamer triads to stabilise the lattice. The binding of ER retrieval signals by  $\alpha$ -,  $\beta$ - and  $\delta$ -COP further facilitates molecular rearrangements that stabilises the COPI coat [53,77,79–82]. Knockdown of CaMKK2 in the prostate cancer cell line LNCaP results in a significant reduction in  $\delta$ -COP protein levels, along with a reduction in  $\alpha$ -COP [25]. Furthermore, inhibition of the kinase activity of CaMKK2 reduces the levels of  $\delta$ -COP to similar levels [25]. This could be due to transcriptional changes, instability of the protein complex due to loss of a direct protein interaction or regulation by phosphorylation, consequently more experiments are required to elucidate this mechanism. The gene encoding  $\delta$ -COP is transcriptionally regulated by the androgen receptor, which makes it more likely to be due to protein stability. The reduction in protein expression of coatamer, in particular  $\delta$ -COP that cross-links the coat proteins, would be expected to negatively impact on the stability of COPI coats and the productive vesicle trafficking events in CaMKK2 knockdown cells, resulting in impaired membrane trafficking and organelle homeostasis. The study observed an enlarged Golgi, ER stress, impaired lysosomal acidification and reduced clathrin-mediated transferrin endocytosis [25]. These membrane trafficking pathways are interconnected due to the topological relationship between these organelles. A loss of transferrin uptake can be due either to a loss of assembly of the clathrin coat at the plasma membrane or a loss of intracellular membrane trafficking. For example, a reduction in  $\beta$ 1-COP expression results in a reduction in transferrin uptake [83]. Furthermore, loss of membrane homeostasis in the ER-Golgi also impacts on the lysosomal maturation and biogenesis [84–87]. In cells where CaMKK2 expression is knocked down the acidification of lysosomes is significantly reduced, the sensitivity to BafilomycinA treatment impaired and the processing of the lysosomal protein CathepsinD reduced [25]. This indicates that membrane trafficking through the Golgi is slowed, which creates an unbalance in the membrane trafficking of the endomembrane compartments. The COPI coatamer complex, and in particular  $\delta$ -COP, is not only required for retrograde vesicle trafficking but also essential for productive autophagy [88–90]. Autophagy is an important mechanism in cancer cells that are under metabolic stress, which produces energy and amino acids necessary for cell survival. Experiments in multiple cancer cells show that COPI vesicle trafficking is not only facilitates Golgi to ER trafficking but also mediates traffic within the ER and to lysosomes and regulates autophagy [73,88,91–94]. The loss of COPI coat components results in impaired cell survival and an increased ER stress, which may be due to the disrupted trafficking leading to an accumulation of proteins in the ER and an activation of the unfolded protein response [88]. This phenotype is also observed upon loss of CaMKK2 expression in a prostate cancer cell line [25], suggesting that the observed accompanying loss of COPI coat proteins may cause of the impaired autophagy and ER stress observed thus further illustrating the significant role of CaMKK2 in Golgi vesicle trafficking and cell survival.

## Implications for our understanding of how CaMKK2 contributes to cancer progression

CaMKK2 is known to be significantly overexpressed in many cancers, including prostate, glioblastoma, liver and ovarian cancer [2,8,18,95,96]. Given the significant literature on the role of AMPK and CAMKIV activities on metabolic regulation, and their established status as CaMKK2 substrates, many of the biological effects of CaMKK2 on cancer have been attributed to this relationship. Our recent study suggests that there are fundamental roles for CaMKK2 as a regulator of membrane trafficking that can have equally profound effects on the metabolic and hence the proliferative capacity of cancer cells [25,97,98]. We know from the work of Michael White and others that COPI coatamer expression and retrograde Golgi trafficking sustains lysosomal activity and metabolic function in LKB1-mutant lung cancers [88,99]. We also know that increased COPI coatamer subunit expression is a cancer marker [88,100]. Our work suggests that CaMKK2 activity supports the same tumorigenic biology. Translationally future studies will need to address whether CaMKK2 activity or expression is a hallmark of the same coatamer-dependent sub-types of cancer and biologically future studies will need to determine what the CaMKK2 substrates are that regulate COPI coatamer subunit expression or stability. Finally given the inability to rescue defects induced by targeting CaMKK2 with either CAMKIV overexpression in liver cancer or with AMPK activators in prostate cancer [28], it will be important to determine whether COPI coatamer subunit overexpression can rescue defects in these or other disease settings. Cell biology and

close attention to the spatial context in which enzymes function can provide new insights into the functions of long-studied kinases in health and disease.

## Conclusion

Our understanding of the functions of CaMKK2 in health and disease has progressed significantly recently through studies of the interactome, kinome, development of new inhibitors and the study of phenotypes and mechanisms in knockdown cells and knockout animals [1,25,28,75,88,101–105]. We have started to uncover new ways in which CaMKK2 regulates energy homeostasis, cell proliferation and migration. In doing so we find that CaMKK2 associated with membranes; plasma membrane, autophagic vacuoles, Golgi apparatus and peroxisomes; regulates novel mechanisms that are relevant for our understanding of CaMKK2 in disease biology and helps us to interpret the effects of novel CaMKK2 inhibitors. We are just starting to appreciate the various functions that CaMKK2 has and how some of these may be cell-type specific and contribute to disease biology [25,75,103].

## Perspectives

- *Importance of the field:* The Golgi apparatus is central to fundamental cellular processes such as protein trafficking, cell proliferation and ion homeostasis. It is, therefore, critical to understand the modulators that regulate the vesicle trafficking that maintains its morphology and function. CaMKK2 is a novel modulator of Golgi vesicle trafficking that is overexpressed in several diseases.
- *Current thinking:* Golgi-mediated cell communication is important for the regulation of cell metabolism, migration and proliferation. Modulators of Golgi vesicle trafficking are important for stabilising the coat components and modulating vesicle trafficking and cellular functions linked to cancer development.
- *Future direction:* Translational research studies will be important to identify sub-types of cancers that are dependent on CaMKK2 and COPI trafficking. The molecular mechanisms that contribute to the stabilisation of coatomer should also be actively investigated as these appear to promote pro-proliferative mechanisms in cancer.

## Competing Interests

The authors declare that there are no competing interests associated with the manuscript.

## Funding

We did not receive funding towards this work.

## Open Access

Open access for this article was enabled by the participation of Queen's University Belfast in an all-inclusive *Read & Publish* agreement with Portland Press and the Biochemical Society under a transformative agreement with JISC.

## Author Contribution

All authors contributed to the writing and approved the final version of the manuscript.

## Abbreviations

AMPK, AMP-activated protein kinase; Ca<sup>2+</sup>, calcium; CaM, calcium and calmodulin; CaMKK2, calcium/calmodulin-dependent protein kinase kinase 2; COG, conserved oligomeric Golgi; EGF, epidermal growth factor; ER, endoplasmic reticulum; FASN, fatty acid synthase; PKC, protein kinase C.



## References

- Pulliam, T.L., Goli, P., Awad, D., Lin, C., Wilkenfeld, S.R. and Frigo, D.E. (2022) Regulation and role of CAMKK2 in prostate cancer. *Nat. Rev. Urol.* **19**, 367–380 <https://doi.org/10.1038/s41585-022-00588-z>
- Lin, F., Marcelo, K.L., Rajapakshe, K., Coarfa, C., Dean, A., Wilganowski, N. et al. (2015) The camKK2/camKIV relay is an essential regulator of hepatic cancer. *Hepatology* **62**, 505–520 <https://doi.org/10.1002/hep.27832>
- Liu, D., Wang, H., Han, B., Meng, X., Chen, M., Yang, D. et al. (2016) CAMKK2, regulated by promoter methylation, is a prognostic marker in diffuse gliomas. *CNS Neurosci. Ther.* **22**, 518–524 <https://doi.org/10.1111/cns.12531>
- Gocher, A.M., Azabdaftari, G., Euscher, L.M., Dai, S., Karacosta, L.G., Franke, T.F. et al. (2017) Akt activation by  $\text{Ca}^{2+}$ /calmodulin-dependent protein kinase kinase 2 (CaMKK2) in ovarian cancer cells. *J. Biol. Chem.* **292**, 14188–14204 <https://doi.org/10.1074/jbc.m117.778464>
- Subbannayya, Y., Syed, N., Barbhuiya, M.A., Raja, R., Marimuthu, A., Sahasrabudhe, N. et al. (2015) Calcium calmodulin dependent kinase kinase 2 - a novel therapeutic target for gastric adenocarcinoma. *Cancer Biol. Ther.* **16**, 336–345 <https://doi.org/10.4161/15384047.2014.972264>
- Anderson, K.A., Means, R.L., Huang, Q.-H., Kemp, B.E., Goldstein, E.G. Selbert, M.A. et al. (1998) Components of a calmodulin-dependent protein kinase cascade molecular cloning, functional characterization and cellular localization of  $\text{Ca}^{2+}$ /calmodulin-dependent protein kinase kinase  $\beta$ . *J. Biol. Chem.* **273**, 31880–31889 <https://doi.org/10.1074/jbc.273.48.31880>
- Tokumitsu, H., Iwabu, M., Ishikawa, Y. and Kobayashi, R. (2001) Differential regulatory mechanism of  $\text{Ca}^{2+}$ /calmodulin-dependent protein kinase kinase isoforms. *Biochemistry* **40**, 13925–13932 <https://doi.org/10.1021/bi010863k>
- Dai, S., Venturini, E., Yadav, S., Lin, X., Clapp, D., Steckiewicz, M. et al. (2022) Calcium/calmodulin-dependent protein kinase kinase 2 mediates pleiotropic effects of epidermal growth factor in cancer cells. *Biochim. Biophys. Acta – Mol. Cell Res.* **1869**, 119252 <https://doi.org/10.1016/j.bbamcr.2022.119252>
- Tokumitsu, H., Muramatsu, M., Ikura, M. and Kobayashi, R. (2000) Regulatory mechanism of  $\text{Ca}^{2+}$ /calmodulin-dependent protein kinase kinase. *J. Biol. Chem.* **275**, 20090–20095 <https://doi.org/10.1074/jbc.m002193200>
- Tokumitsu, H. and Sakagami, H. (2022) Molecular mechanisms underlying  $\text{Ca}^{2+}$ /calmodulin-dependent protein kinase kinase signal transduction. *Int. J. Mol. Sci.* **23**, 11025 <https://doi.org/10.3390/ijms231911025>
- Racioppi, L. and Means, A.R. (2012) Calcium/calmodulin-dependent protein kinase kinase 2: roles in signaling and pathophysiology. *J. Biol. Chem.* **287**, 31658–31665 <https://doi.org/10.1074/jbc.r112.356485>
- Swilius, M.T. and Waxham, M.N. (2008)  $\text{Ca}^{2+}$ /calmodulin-dependent protein kinases. *Cell Mol. Life Sci.* **65**, 2637 <https://doi.org/10.1007/s00018-008-8086-2>
- Hsu, L.-S., Chen, G.-D., Lee, L.-S., Chi, C.-W., Cheng, J.-F. and Chen, J.-Y. (2001) Human  $\text{Ca}^{2+}$ /calmodulin-dependent protein kinase kinase  $\beta$  gene encodes multiple isoforms that display distinct kinase activity. *J. Biol. Chem.* **276**, 31113–31123 <https://doi.org/10.1074/jbc.m011720200>
- Marcelo, K.L., Means, A.R. and York, B. (2016) The  $\text{Ca}^{2+}$ /calmodulin/CaMKK2 axis: nature's metabolic CaMshaft. *Trends Endocrinol. Metab.* **27**, 706–718 <https://doi.org/10.1016/j.tem.2016.06.001>
- Sabbir, M.G., Taylor, C.G. and Zahradka, P. (2020) Hypomorphic CAMKK2 in EA.hy926 endothelial cells causes abnormal transferrin trafficking, iron homeostasis and glucose metabolism. *Biochim. Biophys. Acta – Mol. Cell Res.* **1867**, 118763 <https://doi.org/10.1016/j.bbamcr.2020.118763>
- Karacosta, L.G., Foster, B.A., Azabdaftari, G., Feliciano, D.M. and Edelman, A.M. (2012) A regulatory feedback loop between  $\text{Ca}^{2+}$ /calmodulin-dependent protein kinase kinase 2 (CaMKK2) and the androgen receptor in prostate cancer progression. *J. Biol. Chem.* **287**, 24832–24843 <https://doi.org/10.1074/jbc.m112.370783>
- Nakamura, Y., Okuno, S., Kitani, T., Otake, K., Sato, F. and Fujisawa, H. (2001) Immunohistochemical localization of  $\text{Ca}^{2+}$ /calmodulin-dependent protein kinase kinase  $\beta$  in the rat central nervous system. *Neurosci. Res.* **39**, 175–188 [https://doi.org/10.1016/s0168-0102\(00\)00209-1](https://doi.org/10.1016/s0168-0102(00)00209-1)
- Massie, C.E., Lynch, A., Ramos-Montoya, A., Boren, J., Stark, R., Fazli, L. et al. (2011) The androgen receptor fuels prostate cancer by regulating central metabolism and biosynthesis. *EMBO J.* **30**, 2719–2733 <https://doi.org/10.1038/emboj.2011.158>
- Chauhan, A.S., Zhuang, L. and Gan, B. (2020) Spatial control of AMPK signaling at subcellular compartments. *Crit. Rev. Biochem. Mol.* **55**, 17–32 <https://doi.org/10.1080/10409238.2020.1727840>
- Zhang, C.-S., Jiang, B., Li, M., Zhu, M., Peng, Y., Zhang, Y.-L. et al. (2014) The lysosomal v-ATPase-regulator complex is a common activator for AMPK and mTORC1, acting as a switch between catabolism and anabolism. *Cell Metab.* **20**, 526–540 <https://doi.org/10.1016/j.cmet.2014.06.014>
- Chauhan, A.S., Liu, X., Jing, J., Lee, H., Yadav, R.K., Liu, J. et al. (2019) STIM2 interacts with AMPK and regulates calcium-induced AMPK activation. *FASEB J.* **33**, 2957–2970 <https://doi.org/10.1096/fj.201801225r>
- Mao, L., Li, N., Guo, Y., Xu, X., Gao, L., Xu, Y. et al. (2013) AMPK phosphorylates GBF1 for mitotic Golgi disassembly. *J. Cell Sci.* **126**, 1498–1505 <https://doi.org/10.1242/jcs.121954>
- Huttlin, E.L., Bruckner, R.J., Navarrete-Perea, J., Cannon, J.R., Baltier, K., Gebreab, F. et al. (2021) Dual proteome-scale networks reveal cell-specific remodeling of the human interactome. *Cell* **184**, 3022–3040.e28 <https://doi.org/10.1016/j.cell.2021.04.011>
- Behrends, C., Sowa, M.E., Gygi, S.P. and Harper, J.W. (2010) Network organization of the human autophagy system. *Nature* **466**, 68–76 <https://doi.org/10.1038/nature09204>
- Stewart, L.M., Gerner, L., Rettel, M., Stein, F., Burrows, J.F., Mills, I.G. et al. (2021) CaMKK2 facilitates Golgi-associated vesicle trafficking to sustain cancer cell proliferation. *Cell Death Dis.* **12**, 1040 <https://doi.org/10.1038/s41419-021-04335-x>
- Buljan, M., Ciuffa, R., van Drogen, A., Vichalkovski, A., Mehner, M., Rosenberger, G. et al. (2020) Kinase interaction network expands functional and disease roles of human kinases. *Mol. Cell* **79**, 504–520.e9 <https://doi.org/10.1016/j.molcel.2020.07.001>
- Wang, Y.-Z., Lu, J., Li, Y.-Y., Zhong, Y.-J., Yang, C.-F., Zhang, Y. et al. (2021) microRNA-378b regulates ethanol-induced hepatic steatosis by targeting CaMKK2 to mediate lipid metabolism. *Bioengineered* **12**, 12659–12676 <https://doi.org/10.1080/21655979.2021.2003677>
- Penfold, L., Woods, A., Muckett, P., Nikitin, A.Y., Kent, T.R., Zhang, S. et al. (2018) CAMKK2 promotes prostate cancer independently of AMPK via increased lipogenesis. *Cancer Res.* **78**, 6747–6761 <https://doi.org/10.1158/0008-5472.can-18-0585>
- Najar, M.A., Arefian, M., Sidransky, D., Gowda, H., Prasad, T.S.K., Modi, P.K., et al. (2022) Tyrosine phosphorylation profiling revealed the signaling network characteristics of CAMKK2 in gastric adenocarcinoma. *Front. Genet.* **13**, 854764 <https://doi.org/10.3389/fgene.2022.854764>
- Najar, M.A., Modi, P.K., Ramesh, P., Sidransky, D., Gowda, H., Prasad, T.S.K., et al. (2021) Molecular profiling associated with calcium/calmodulin-dependent protein kinase kinase 2 (CAMKK2)-mediated carcinogenesis in gastric cancer. *J. Proteome Res.* **20**, 2687–2703 <https://doi.org/10.1021/acs.jproteome.1c00008>

- 31 Sargeant, J. and Hay, J.C. (2022)  $\text{Ca}^{2+}$  regulation of constitutive vesicle trafficking. *Fac. Rev.* **11**, 6 <https://doi.org/10.12703/r/11-6>
- 32 Elíes, J., Yáñez, M., Pereira, T.M.C., Gil-Longo, J., MacDougall, D.A. and Campos-Toimil, M. (2019) Calcium signaling. *Adv. Exp. Med. Biol.* **1131**, 183–213 [https://doi.org/10.1007/978-3-030-12457-1\\_8](https://doi.org/10.1007/978-3-030-12457-1_8)
- 33 Martens, S. and McMahon, H.T. (2011) Chapter 6 C2 domains and membrane fusion. *Curr. Top. Membr.* **68**, 141–159 <https://doi.org/10.1016/b978-0-12-385891-7.00006-4>
- 34 Jin, Y.-H., Wu, X.-S., Shi, B., Zhang, Z., Guo, X., Gan, L. et al. (2019) Protein kinase C and calmodulin serve as calcium sensors for calcium-stimulated endocytosis at synapses. *J. Neurosci.* **39**, 9478–9490 <https://doi.org/10.1523/jneurosci.0182-19.2019>
- 35 Clayton, E.L., Anggono, V., Smillie, K.J., Chau, N., Robinson, P.J. and Cousin, M.A. (2009) The phospho-dependent dynamin-syndapin interaction triggers activity-dependent bulk endocytosis of synaptic vesicles. *J. Neurosci.* **29**, 7706–7717 <https://doi.org/10.1523/jneurosci.1976-09.2009>
- 36 Pelkmans, L., Fava, E., Grabner, H., Hannus, M., Habermann, B., Kraus, E. et al. (2005) Genome-wide analysis of human kinases in clathrin- and caveolae/raft-mediated endocytosis. *Nature* **436**, 78–86 <https://doi.org/10.1038/nature03571>
- 37 Cho, H.J. and Mook-Jung, I. (2020) Amyloid beta regulates ER exit sites formation through O-GlcNAcylation triggered by disrupted calcium homeostasis. *Biol. Cell* **112**, 439–451 <https://doi.org/10.1111/boc.201900062>
- 38 Cho, H.J. and Mook-Jung, I. (2018) O-GlcNAcylation regulates endoplasmic reticulum exit sites through Sec31A modification in conventional secretory pathway. *FASEB J.* **32**, 4641–4657 <https://doi.org/10.1096/fj.201701523r>
- 39 Ahluwalia, J.P., Topp, J.D., Weirather, K., Zimmerman, M. and Starnes, M. (2001) A role for calcium in stabilizing transport vesicle coats. *J. Biol. Chem.* **276**, 34148–34155 <https://doi.org/10.1074/jbc.m105398200>
- 40 Bentley, M., Nycz, D.C., Joglekar, A., Fertschai, I., Malli, R., Graier, W.F. et al. (2010) Vesicular calcium regulates coat retention, fusogenicity, and size of pre-Golgi intermediates. *Mol. Biol. Cell* **21**, 1033–1046 <https://doi.org/10.1091/mbc.e09-10-0914>
- 41 Chin, D. and Means, A.R. (2000) Calmodulin: a prototypical calcium sensor. *Trends Cell Biol.* **10**, 322–328 [https://doi.org/10.1016/s0962-8924\(00\)01800-6](https://doi.org/10.1016/s0962-8924(00)01800-6)
- 42 Porat, A. and Elazar, Z. (2000) Regulation of intra-Golgi membrane transport by calcium. *J. Biol. Chem.* **275**, 29233–29237 <https://doi.org/10.1074/jbc.m005316200>
- 43 Zha, X., Chandra, S., Ridsdale, A.J. and Morrison, G.H. (1995) Golgi apparatus is involved in intracellular  $\text{Ca}^{2+}$  regulation in epithelial LLC-PK1 cells. *Am. J. Physiol.* **268**, C1133–C1140 <https://doi.org/10.1152/ajpcell.1995.268.5.c1133>
- 44 Zha, X. and Morrison, G.H. (1995) Ion microscopy evidence that  $\text{La}^{3+}$  releases  $\text{Ca}^{2+}$  from Golgi complex in LLC-PK1 cells. *Am. J. Physiol.* **269**, C923–C928 <https://doi.org/10.1152/ajpcell.1995.269.4.c923>
- 45 Galenkamp, K.M.O., Sosicka, P., Jung, M., Recouvreux, M.V., Zhang, Y., Moldenhauer, M.R. et al. (2020) Golgi acidification by NHE7 regulates cytosolic pH homeostasis in pancreatic cancer cells. *Cancer Discov.* **10**, 822–835 <https://doi.org/10.1158/2159-8290.cd-19-1007>
- 46 Martins, M., Fernandes, A.S. and Saraiva, N. (2022) GOLGI: cancer cell fate control. *Int. J. Biochem. Cell Biol.* **145**, 106174 <https://doi.org/10.1016/j.biocel.2022.106174>
- 47 Hassinen, A., Khoder-Agha, F., Khosrowabadi, E., Mennerich, D., Harrus, D., Noel, M. et al. (2019) A Golgi-associated redox switch regulates catalytic activation and cooperative functioning of ST6Gal-I with B4GalT-I. *Redox Biol.* **24**, 101182 <https://doi.org/10.1016/j.redox.2019.101182>
- 48 Rizzo, R., Russo, D., Kurokawa, K., Sahu, P., Lombardi, B., Supino, D. et al. (2021) Golgi maturation-dependent glycoenzyme recycling controls glycosphingolipid biosynthesis and cell growth via GOLPH3. *EMBO J.* **40**, e107238 <https://doi.org/10.15252/embj.2020107238>
- 49 Carrara, G., Saraiva, N., Parsons, M., Byrne, B., Prole, D.L., Taylor, C.W. et al. (2015) Golgi anti-apoptotic proteins are highly conserved ion channels that affect apoptosis and cell migration. *J. Biol. Chem.* **290**, 11785–11801 <https://doi.org/10.1074/jbc.m115.637306>
- 50 Wenzel, E.M., Elfmark, L.A., Stenmark, H. and Raiborg, C. (2022) ER as master regulator of membrane trafficking and organelle function. *J. Cell Biol.* **221**, e202205135 <https://doi.org/10.1083/jcb.202205135>
- 51 Bonifacino, J.S. and Lippincott-Schwartz, J. (2003) Coat proteins: shaping membrane transport. *Nat. Rev. Mol. Cell Biol.* **4**, 409–414 <https://doi.org/10.1038/nrm1099>
- 52 Saftig, P. and Klumperman, J. (2009) Lysosome biogenesis and lysosomal membrane proteins: trafficking meets function. *Nat. Rev. Mol. Cell Biol.* **10**, 623–635 <https://doi.org/10.1038/nrm2745>
- 53 Noble, A.J. and Stagg, S.M. (2015) COPI gets a fancy new coat. *Science* **349**, 142–143 <https://doi.org/10.1126/science.aac6537>
- 54 Robinson, M.S. (2015) Forty years of clathrin-coated vesicles. *Traffic* **16**, 1210–1238 <https://doi.org/10.1111/tra.12335>
- 55 Dell'Angelica, E.C. and Bonifacino, J.S. (2019) Coatopathies: genetic disorders of protein coats. *Annu. Rev. Cell Dev. Biol.* **35**, 131–168 <https://doi.org/10.1146/annurev-cellbio-100818-125234>
- 56 Tang, T., Yang, Z., Wang, D., Yang, X., Wang, J., Li, L. et al. (2020) The role of lysosomes in cancer development and progression. *Cell Biosci.* **10**, 131 <https://doi.org/10.1186/s13578-020-00489-x>
- 57 Saito, K., Maeda, M. and Katada, T. (2017) Regulation of the Sar1 GTPase cycle is necessary for large cargo secretion from the endoplasmic reticulum. *Front. Cell Dev. Biol.* **5**, 75 <https://doi.org/10.3389/fcell.2017.00075>
- 58 Blackburn, J.B., D'Souza, Z. and Lupashin, V.V. (2019) Maintaining order: COG complex controls Golgi trafficking, processing, and sorting. *FEBS Lett.* **593**, 2466–2487 <https://doi.org/10.1002/1873-3468.13570>
- 59 Makhoul, C., Gosavi, P. and Gleeson, P.A. (2019) Golgi dynamics: the morphology of the mammalian Golgi apparatus in health and disease. *Front. Cell Dev. Biol.* **7**, 112 <https://doi.org/10.3389/fcell.2019.00112>
- 60 Chia, J., Goh, G., Racine, V., Ng, S., Kumar, P. and Bard, F. (2012) RNAi screening reveals a large signaling network controlling the Golgi apparatus in human cells. *Mol. Syst. Biol.* **8**, 629 <https://doi.org/10.1038/msb.2012.59>
- 61 Custer, S.K., Foster, J.N., Astroski, J.W. and Androphy, E.J. (2019) Abnormal Golgi morphology and decreased COPI function in cells with low levels of SMN. *Brain Res.* **1706**, 135–146 <https://doi.org/10.1016/j.brainres.2018.11.005>
- 62 Fujimoto, T., Kuwahara, T., Eguchi, T., Sakurai, M., Komori, T. and Iwatsubo, T. (2018) Parkinson's disease-associated mutant LRRK2 phosphorylates Rab7L1 and modifies trans-Golgi morphology. *Biochem. Biophys. Res. Commun.* **495**, 1708–1715 <https://doi.org/10.1016/j.bbrc.2017.12.024>
- 63 Kelly, E.E., Giordano, F., Horgan, C.P., Jollivet, F., Raposo, G. and McCaffrey, M.W. (2012) Rab30 is required for the morphological integrity of the Golgi apparatus. *Biol. Cell* **104**, 84–101 <https://doi.org/10.1111/boc.201100080>

- 64 Liu, S., Hunt, L. and Storrie, B. (2013) Rab41 is a novel regulator of Golgi apparatus organization that is needed for ER-to-Golgi trafficking and cell growth. *PLoS One* **8**, e71886 <https://doi.org/10.1371/journal.pone.0071886>
- 65 Liu, S. and Storrie, B. (2015) Chapter one how Rab proteins determine Golgi structure. *Int. Rev. Cel Mol. Biol.* **315**, 1–22 <https://doi.org/10.1016/b.ircmb.2014.12.002>
- 66 Makhoul, C., Gosavi, P., Duffield, R., Delbridge, B., Williamson, N.A. and Gleeson, P.A. (2019) Intersectin-1 interacts with the Golgin GCC88 to couple the actin network and Golgi architecture. *Mol. Biol. Cell* **30**, 370–386 <https://doi.org/10.1091/mbc.e18-05-0313>
- 67 Paul, B.D. (2021) Signaling overlap between the Golgi stress response and cysteine metabolism in huntington's disease. *Antioxidants* **10**, 1468 <https://doi.org/10.3390/antiox10091468>
- 68 Eisenberg-Lerner, A., Benyair, R., Hizkiahou, N., Nudel, N., Maor, R., Kramer, M.P. et al. (2020) Golgi organization is regulated by proteasomal degradation. *Nat. Commun.* **11**, 409 <https://doi.org/10.1038/s41467-019-14038-9>
- 69 Sasaki, K. and Yoshida, H. (2019) Golgi stress response and organelle zones. *FEBS Lett.* **593**, 2330–2340 <https://doi.org/10.1002/1873-3468.13554>
- 70 Gao, J., Gao, A., Liu, W. and Chen, L. (2021) Golgi stress response: a regulatory mechanism of Golgi function. *Biofactors* **47**, 964–974 <https://doi.org/10.1002/biof.1780>
- 71 Makhoul, C. and Gleeson, P.A. (2021) Regulation of mTORC1 activity by the Golgi apparatus. *Fac Rev.* **10**, 50 <https://doi.org/10.12703/r/10-50>
- 72 Carosi, J.M., Fourrier, C., Bensalem, J. and Sargeant, T.J. (2022) The mTOR–lysosome axis at the centre of ageing. *FEBS Open Biol.* **12**, 739–757 <https://doi.org/10.1002/2211-5463.13347>
- 73 Zhang, J., Andersen, J.-P., Sun, H., Liu, X., Sonenberg, N., Nie, J. et al. (2020) Aster-C coordinates with COP I vesicles to regulate lysosomal trafficking and activation of mTORC1. *EMBO Rep.* **21**, e49898 <https://doi.org/10.15252/embr.201949898>
- 74 Thomas, J.D., Zhang, Y.-J., Wei, Y.-H., Cho, J.-H., Morris, L.E., Wang, H.-Y. et al. (2014) Rab1a is an mTORC1 activator and a colorectal oncogene. *Cancer Cell* **26**, 754–769 <https://doi.org/10.1016/j.ccell.2014.09.008>
- 75 Suzuki, Y., Ozawa, T., Kurata, T., Nakajima, N., Zamponi, G.W., Giles, W.R. et al. (2022) A molecular complex of Cav1.2/CaMKK2/CaMK1a in caveolae is responsible for vascular remodeling via excitation–transcription coupling. *Proc. Natl Acad. Sci. U.S.A.* **119**, e2117435119 <https://doi.org/10.1073/pnas.2117435119>
- 76 Sabbir, M.G. (2018) Loss of Ca<sup>2+</sup>/calmodulin dependent protein kinase kinase 2 leads to aberrant transferrin phosphorylation and trafficking: a potential biomarker for Alzheimer's disease. *Front. Mol. Biosci.* **5**, 99 <https://doi.org/10.3389/fmolb.2018.00099>
- 77 Dodonova, S.O., Diestelkoetter-Bachert, P., von Appen, A., Hagen, W.J.H., Beck, R., Beck, M. et al. (2015) A structure of the COPI coat and the role of coat proteins in membrane vesicle assembly. *Science* **349**, 195–198 <https://doi.org/10.1126/science.aab1121>
- 78 Hara-Kuge, S., Kuge, O., Orci, L., Amherdt, M., Ravazzola, M., Wieland, F. et al. (1994) En bloc incorporation of coatomer subunits during the assembly of COP-coated vesicles. *J. Cell Biol.* **124**, 883–892 <https://doi.org/10.1083/jcb.124.6.883>
- 79 Lowe, M. and Kreis, T.E. (1995) In vitro assembly and disassembly of coatomer. *J. Biol. Chem.* **270**, 31364–31371 <https://doi.org/10.1074/jbc.270.52.31364>
- 80 Pavel, J., Harter, C. and Wieland, F.T. (1998) Reversible dissociation of coatomer: functional characterization of a  $\beta/\delta$ -coat protein subcomplex. *Proc. Natl Acad. Sci. U.S.A.* **95**, 2140–2145 <https://doi.org/10.1073/pnas.95.5.2140>
- 81 Fiedler, K., Veit, M., Stamnes, M.A. and Rothman, J.E. (1996) Bimodal interaction of coatomer with the p24 family of putative cargo receptors. *Science* **273**, 1396–1399 <https://doi.org/10.1126/science.273.5280.1396>
- 82 Bykov, Y.S., Schaffer, M., Dodonova, S.O., Albert, S., Plitzko, J.M., Baumeister, W. et al. (2017) The structure of the COPI coat determined within the cell. *eLife* **6**, e32493 <https://doi.org/10.7554/eLife.32493>
- 83 Razi, M., Chan, E.Y.W. and Tooze, S.A. (2009) Early endosomes and endosomal coatomer are required for autophagy. *J. Cell Biol.* **185**, 305–321 <https://doi.org/10.1083/jcb.200810098>
- 84 Luzio, J.P., Hackmann, Y., Dieckmann, N.M.G. and Griffiths, G.M. (2014) The biogenesis of lysosomes and lysosome-related organelles. *Cold Spring Harb. Perspect. Biol.* **6**, a016840 <https://doi.org/10.1101/cshperspect.a016840>
- 85 Hesketh, G.G., Wartosch, L., Davis, L.J., Bright, N.A. and Luzio, J.P. (2018) Endocytosis and signaling. *Prog. Mol. Subcell. Biol.* **57**, 151–180 [https://doi.org/10.1007/978-3-319-96704-2\\_6](https://doi.org/10.1007/978-3-319-96704-2_6)
- 86 Ballabio, A. and Bonifacio, J.S. (2020) Lysosomes as dynamic regulators of cell and organismal homeostasis. *Nat. Rev. Mol. Cell Biol.* **21**, 101–118 <https://doi.org/10.1038/s41580-019-0185-4>
- 87 Bouhamdani, N., Comeau, D. and Turcotte, S. (2021) A compendium of information on the lysosome. *Front. Cell Dev. Biol.* **9**, 798262 <https://doi.org/10.3389/fcell.2021.798262>
- 88 Claerhout, S., Dutta, B., Bossuyt, W., Zhang, F., Nguyen-Charles, C., Dennison, J.B. et al. (2012) Abortive autophagy induces endoplasmic reticulum stress and cell death in cancer cells. *PLoS One* **7**, e39400 <https://doi.org/10.1371/journal.pone.0039400>
- 89 Gasparian, A., Akseanova, M., Oliver, D., Levina, E., Doran, R., Lucius, M. et al. (2022) Depletion of COPI in cancer cells: the role of ROS in the induction of lipid accumulation, non-canonical lipophagy and apoptosis. *Mol. Biol. Cell* **33**, ar135 <https://doi.org/10.1091/mbc.e21-08-0420>
- 90 Oliver, D., Ji, H., Liu, P., Gasparian, A., Gardiner, E., Lee, S. et al. (2017) Identification of novel cancer therapeutic targets using a designed and pooled shRNA library screen. *Sci. Rep.* **7**, 43023–43016 <https://doi.org/10.1038/srep43023>
- 91 Piccolis, M., Bond, L.M., Kampmann, M., Pulimeno, P., Chitraju, C., Jayson, C.B.K. et al. (2019) Probing the global cellular responses to lipotoxicity caused by saturated fatty acids. *Mol. Cell* **74**, 32–44.e8 <https://doi.org/10.1016/j.molcel.2019.01.036>
- 92 Guo, Y., Walther, T.C., Rao, M., Stuurman, N., Goshima, G., Terayama, K. et al. (2008) Functional genomic screen reveals genes involved in lipid-droplet formation and utilization. *Nature* **453**, 657–661 <https://doi.org/10.1038/nature06928>
- 93 Li, C., Luo, X., Zhao, S., Siu, G.K., Liang, Y., Chan, H.C. et al. (2017) COPI–TRAPPII activates Rab18 and regulates its lipid droplet association. *EMBO J.* **36**, 441–457 <https://doi.org/10.15252/embj.201694866>
- 94 Soni, K.G., Mardones, G.A., Sougrat, R., Smirnova, E., Jackson, C.L. and Bonifacio, J.S. (2009) Coatomer-dependent protein delivery to lipid droplets. *J. Cell Sci.* **122**, 1834–1841 <https://doi.org/10.1242/jcs.045849>
- 95 Frigo, D.E., Howe, M.K., Wittmann, B.M., Brunner, A.M., Cushman, I., Wang, Q. et al. (2011) Cam kinase kinase  $\beta$ -mediated activation of the growth regulatory kinase AMPK is required for androgen-dependent migration of prostate cancer cells. *Cancer Res.* **71**, 528–537 <https://doi.org/10.1158/0008-5472.can-10-2581>

- 96 Tomaszewski, W.H., Waibl-Polania, J., Chakraborty, M., Perera, J., Ratiu, J., Miggelbrink, A. et al. (2022) Neuronal CaMKK2 promotes immunosuppression and checkpoint blockade resistance in glioblastoma. *Nat. Commun.* **13**, 6483 <https://doi.org/10.1038/s41467-022-34175-y>
- 97 Feng, Y., Sun, C., Zhang, L., Wan, H., Zhou, H., Chen, Y. et al. (2022) Upregulation of COPB2 promotes prostate cancer proliferation and invasion through the MAPK/TGF- $\beta$  signaling pathway. *Front. Oncol.* **12**, 865317 <https://doi.org/10.3389/fonc.2022.865317>
- 98 Hu, L., Chen, X., Narwade, N., Lim, M.G.L., Chen, Z., Tennakoon, C. et al. (2021) Single-cell analysis reveals androgen receptor regulates the ER-to-Golgi trafficking pathway with CREB3L2 to drive prostate cancer progression. *Oncogene* **40**, 6479–6493 <https://doi.org/10.1038/s41388-021-02026-7>
- 99 Kim, H.S., Mendiratta, S., Kim, J., Pecot, C.V., Larsen, J.E., Zubovych, I. et al. (2013) Systematic identification of molecular subtype-selective vulnerabilities in non-small-cell lung cancer. *Cell* **155**, 552–566 <https://doi.org/10.1016/j.cell.2013.09.041>
- 100 Giudice, S.D., Luca, V.D., Parizadeh, S., Russo, D., Luini, A. and Martino, R.D. (2022) Endogenous and exogenous regulatory signaling in the secretory pathway: role of Golgi signaling molecules in cancer. *Front. Cell Dev. Biol.* **10**, 833663 <https://doi.org/10.3389/fcell.2022.833663>
- 101 Stork, B.A., Dean, A., Ortiz, A.R., Saha, P., Putluri, N., Planas-Silva, M.D. et al. (2022) Calcium/calmodulin-dependent protein kinase kinase 2 regulates hepatic fuel metabolism. *Mol. Metab.* **62**, 101513 <https://doi.org/10.1016/j.molmet.2022.101513>
- 102 Pulliam, T.L., Awad, D., Han, J.J., Murray, M.M., Ackroyd, J.J., Goli, P. et al. (2022) Systemic ablation of Camkk2 impairs metastatic colonization and improves insulin sensitivity in TRAMP mice: evidence for cancer cell-extrinsic CAMKK2 functions in prostate cancer. *Cells* **11**, 1890 <https://doi.org/10.3390/cells11121890>
- 103 Lee, A., Kondapalli, C., Virga, D.M., Lewis, T.L., Koo, S.Y., Ashok, A. et al. (2022) A $\beta$ 42 oligomers trigger synaptic loss through CAMKK2-AMPK-dependent effectors coordinating mitochondrial fission and mitophagy. *Nat. Commun.* **13**, 4444 <https://doi.org/10.1038/s41467-022-32130-5>
- 104 Han, J.H., Kim, Y.K., Kim, H., Lee, J., Oh, M.J., Kim, S.B. et al. (2022) Snail acetylation by autophagy-derived acetyl-coenzyme A promotes invasion and metastasis of KRAS-LKB1 co-mutated lung cancer cells. *Cancer Commun.* **42**, 716–749 <https://doi.org/10.1002/cac2.12332>
- 105 Profeta, G.S., Dos Reis, C.V., Santiago, A.D.S., Godoi, P.H.C., Fala, A.M., Wells, C.I. et al. (2019) Binding and structural analyses of potent inhibitors of the human Ca<sup>2+</sup>/calmodulin dependent protein kinase kinase 2 (CAMKK2) identified from a collection of commercially-available kinase inhibitors. *Sci. Rep.* **9**, 16452 <https://doi.org/10.1038/s41598-019-52795-1>
